# Supplementary material for: Obesity-Dependent Association of the rs10454142 PPP1R21 with Breast Cancer
Source: MDPI journal article supplement (doi:10.3390/biomedicines12040818), 2024-04-08
Supplement: s1 [file s1]

**Supplementary Table 1.** The GWAS data about associations of the studied candidate gene polymorphisms with the circulating SHBG and other sex hormone concentrations.

| SNP,<br>gene                 | Chromosome<br>position<br>(hg38) | Phenotype                               | Association (significance)<br>(affected allele) | Reference |
|------------------------------|----------------------------------|-----------------------------------------|-------------------------------------------------|-----------|
| rs17496332<br><i>PRMT6</i>   | 1p13.3<br>(107003753)            | SHBG                                    | $\beta=-0.028$ ( $p=1\times10^{-11}$ ) (A)      | [19]      |
| rs780093<br><i>GCKR</i>      | 2p23.3<br>(27519736)             | SHBG                                    | $\beta=-0.032$ ( $p=2\times10^{-16}$ ) (T)      | [19]      |
| rs10454142<br><i>FOXN2</i>   | 2p16.3<br>(48419260)             | SHBG                                    | $\beta=0.026$ ( $p=1\times10^{-7}$ ) (T)        | [19]      |
| rs3779195<br><i>BAIAP2L1</i> | 7q21.3<br>(98364050)             | SHBG                                    | $\beta=-0.033$ ( $p=3\times10^{-8}$ ) (A)       | [19]      |
|                              |                                  | SHBG<br>(women, pre-menopause)          | $\beta=-2.41$ ( $p=9\times10^{-09}$ ) (A)       | [44]      |
| rs440837<br><i>ZBTB10</i>    | 8q21.13<br>(80549739)            | SHBG                                    | $\beta=-0.030$ ( $p=3\times10^{-9}$ ) (A)       | [19]      |
|                              |                                  | SHBG<br>(women, post-menopause)         | $\beta=1.43$ ( $p=1\times10^{-12}$ ) (G)        | [44]      |
|                              |                                  | SHBG (men)                              | $\beta=0.57$ ( $p=8\times10^{-9}$ ) (G)         | [44]      |
| rs7910927<br><i>JMJD1C</i>   | 10q21.3<br>(63379150)            | SHBG                                    | $\beta=-0.048$ ( $p=6\times10^{-35}$ ) (T)      | [19]      |
|                              |                                  | SHBG                                    | $\beta=0.029$ ( $p=2\times10^{-8}$ ) (T)        | [19]      |
|                              |                                  | low<br>testosterone<br>levels (men)     | OR=1.14 ( $p=7\times10^{-16}$ ) (C)             | [45]      |
|                              |                                  | testosterone<br>(women)                 | $\beta=0.028$ ( $p=5\times10^{-10}$ ) (C)       | [46]      |
|                              |                                  | SHBG<br>(women)                         | $\beta=-0.065$ ( $p=5\times10^{-48}$ ) (C)      | [46]      |
|                              |                                  | SHBG<br>(women, pre-menopause)          | $\beta=-0.062$ ( $p=8\times10^{-11}$ ) (C)      | [46]      |
| rs4149056<br><i>SLCO1B1</i>  | 12p12.1<br>(21178615)            | SHBG<br>(women, post-menopause)         | $\beta=-0.079$ ( $p=7\times10^{-34}$ ) (C)      | [46]      |
|                              |                                  | bioavailable<br>testosterone<br>(women) | $\beta=0.02$ ( $p=2\times10^{-16}$ ) (C)        | [44]      |
|                              |                                  | SHBG (men)                              | $\beta=-1.23$ ( $p=7\times10^{-29}$ ) (C)       | [44]      |
|                              |                                  | SHBG<br>(women)                         | $\beta=0.030$ ( $p=1\times10^{-73}$ ) (T)       | [47]      |
|                              |                                  | SHBG (men)                              | $\beta=0.032$ ( $p=6\times10^{-99}$ ) (T)       | [47]      |
|                              |                                  | total<br>testosterone<br>(women)        | $\beta=-0.029$ ( $p=1\times10^{-14}$ ) (T)      | [47]      |

|                             |                       |                                   |                                             |      |
|-----------------------------|-----------------------|-----------------------------------|---------------------------------------------|------|
|                             |                       | bioavailable testosterone (women) | $\beta=-0.043$ ( $p=3\times 10^{-35}$ ) (T) | [47] |
|                             |                       | total testosterone (men)          | $\beta=0.054$ ( $p=1\times 10^{-39}$ ) (T)  | [47] |
| rs8023580<br><i>PPP1R21</i> | 15q26.2<br>(96165062) | SHBG                              | $\beta=-0.03$ ( $p=8\times 10^{-12}$ ) (T)  | [19] |
|                             |                       | low testosterone levels (men)     | OR=1.13 ( $p=1\times 10^{-19}$ ) (T)        | [45] |
| rs12150660<br><i>SHBG</i>   | 17p13.1<br>(7618597)  | SHBG                              | $\beta=0.103$ ( $p=2\times 10^{-106}$ ) (T) | [19] |
|                             |                       | SHBG (women)                      | $\beta=6.14$ ( $p=1\times 10^{-300}$ ) (T)  | [44] |
|                             |                       | SHBG (men)                        | $\beta=3.9$ ( $p=2\times 10^{-75}$ ) (T)    | [48] |
|                             |                       | total testosterone (men)          | $\beta=31.8$ ( $p=1\times 10^{-41}$ ) (T)   | [48] |
