# Supplementary material for: Obesity-Dependent Association of the rs10454142 PPP1R21 with Breast Cancer
Source: MDPI journal article supplement (doi:10.3390/biomedicines12040818), 2024-04-08
Supplement: s1 [file s1]

**Supplementary Table 2.** The allele and genotype frequencies of the studied SNPs in the breast cancer and control groups with BMI<30.

| Chr                            | SNP        | Gene            | Minor allele | Major allele | Minor allele frequency | Number of the studied chromosomes | Genotype distribution* | H <sub>o</sub> | H <sub>e</sub> | P <sub>HWE</sub> |
|--------------------------------|------------|-----------------|--------------|--------------|------------------------|-----------------------------------|------------------------|----------------|----------------|------------------|
| Breast cancer patients (n=239) |            |                 |              |              |                        |                                   |                        |                |                |                  |
| 1                              | rs17496332 | <i>PRMT6</i>    | G            | A            | 0.360                  | 470                               | 37/95/103              | 0.40           | 0.46           | 0.066            |
| 2                              | rs780093   | <i>GCKR</i>     | T            | C            | 0.405                  | 472                               | 35/121/80              | 0.51           | 0.48           | 0.348            |
| 2                              | rs10454142 | <i>PPP1R21</i>  | C            | T            | 0.323                  | 462                               | 21/107/103             | 0.46           | 0.44           | 0.451            |
| 7                              | rs3779195  | <i>BAIAP2L1</i> | A            | T            | 0.190                  | 464                               | 7/74/151               | 0.32           | 0.31           | 0.673            |
| 8                              | rs440837   | <i>ZBTB10</i>   | G            | A            | 0.246                  | 464                               | 18/78/136              | 0.34           | 0.37           | 0.158            |
| 10                             | rs7910927  | <i>JMJD1C</i>   | T            | G            | 0.475                  | 472                               | 50/124/62              | 0.53           | 0.50           | 0.437            |
| 12                             | rs4149056  | <i>SLCO1B1</i>  | C            | T            | 0.204                  | 470                               | 8/80/147               | 0.34           | 0.33           | 0.552            |
| 15                             | rs8023580  | <i>NR2F2</i>    | C            | T            | 0.265                  | 472                               | 15/95/126              | 0.40           | 0.39           | 0.738            |
| 17                             | rs12150660 | <i>SHBG</i>     | T            | G            | 0.246                  | 472                               | 14/88/134              | 0.37           | 0.37           | 1.000            |
| Control group (n=887)          |            |                 |              |              |                        |                                   |                        |                |                |                  |
| 1                              | rs17496332 | <i>PRMT6</i>    | G            | A            | 0.366                  | 1660                              | 116/375/339            | 0.45           | 0.46           | 0.455            |
| 2                              | rs780093   | <i>GCKR</i>     | T            | C            | 0.404                  | 1702                              | 141/406/304            | 0.48           | 0.48           | 0.776            |
| 2                              | rs10454142 | <i>PPP1R21</i>  | C            | T            | 0.318                  | 1682                              | 88/358/395             | 0.43           | 0.43           | 0.633            |
| 7                              | rs3779195  | <i>BAIAP2L1</i> | A            | T            | 0.183                  | 1682                              | 35/237/569             | 0.28           | 0.30           | 0.106            |
| 8                              | rs440837   | <i>ZBTB10</i>   | G            | A            | 0.246                  | 1642                              | 46/312/463             | 0.38           | 0.37           | 0.572            |
| 10                             | rs7910927  | <i>JMJD1C</i>   | T            | G            | 0.503                  | 1702                              | 218/420/213            | 0.49           | 0.50           | 0.732            |
| 12                             | rs4149056  | <i>SLCO1B1</i>  | C            | T            | 0.225                  | 1612                              | 47/269/490             | 0.33           | 0.35           | 0.226            |
| 15                             | rs8023580  | <i>NR2F2</i>    | C            | T            | 0.292                  | 1698                              | 82/332/435             | 0.39           | 0.41           | 0.115            |
| 17                             | rs12150660 | <i>SHBG</i>     | T            | G            | 0.254                  | 1708                              | 65/304/485             | 0.36           | 0.38           | 0.086            |

Note: \* minor allele homozygotes / heterozygotes / major allele homozygotes
