# Supplementary material for: Obesity-Dependent Association of the rs10454142 PPP1R21 with Breast Cancer
Source: MDPI journal article supplement (doi:10.3390/biomedicines12040818), 2024-04-08
Supplement: s1 [file s1]

**Supplementary Table 3.** The allele and genotype frequencies of the studied SNPs in the breast cancer and control groups with BMI $\geq$ 30.

| Chr                            | SNP        | Gene            | Minor allele | Major allele | Minor allele frequency | Number of the studied chromosomes | Genotype distribution* | H <sub>o</sub> | H <sub>e</sub> | P <sub>HWE</sub> |
|--------------------------------|------------|-----------------|--------------|--------------|------------------------|-----------------------------------|------------------------|----------------|----------------|------------------|
| Breast cancer patients (n=119) |            |                 |              |              |                        |                                   |                        |                |                |                  |
| 1                              | rs17496332 | <i>PRMT6</i>    | G            | A            | 0.346                  | 234                               | 14/53/50               | 0.45           | 0.45           | 1.000            |
| 2                              | rs780093   | <i>GCKR</i>     | T            | C            | 0.372                  | 234                               | 11/65/41               | 0.56           | 0.47           | 0.051            |
| 2                              | rs10454142 | <i>PPP1R21</i>  | C            | T            | 0.397                  | 234                               | 15/63/39               | 0.54           | 0.48           | 0.246            |
| 7                              | rs3779195  | <i>BAIAP2L1</i> | A            | T            | 0.174                  | 224                               | 2/35/75                | 0.31           | 0.29           | 0.518            |
| 8                              | rs440837   | <i>ZBTB10</i>   | G            | A            | 0.195                  | 236                               | 4/38/76                | 0.32           | 0.31           | 1.000            |
| 10                             | rs7910927  | <i>JMJD1C</i>   | T            | G            | 0.483                  | 236                               | 26/62/30               | 0.53           | 0.50           | 0.712            |
| 12                             | rs4149056  | <i>SLCO1B1</i>  | C            | T            | 0.216                  | 236                               | 5/41/72                | 0.35           | 0.34           | 1.000            |
| 15                             | rs8023580  | <i>NR2F2</i>    | C            | T            | 0.263                  | 236                               | 5/52/61                | 0.44           | 0.39           | 0.162            |
| 17                             | rs12150660 | <i>SHBG</i>     | T            | G            | 0.263                  | 236                               | 9/44/65                | 0.37           | 0.39           | 0.641            |
| Control group (n=253)          |            |                 |              |              |                        |                                   |                        |                |                |                  |
| 1                              | rs17496332 | <i>PRMT6</i>    | G            | A            | 0.381                  | 480                               | 36/111/93              | 0.46           | 0.47           | 0.785            |
| 2                              | rs780093   | <i>GCKR</i>     | T            | C            | 0.407                  | 482                               | 43/110/88              | 0.46           | 0.48           | 0.424            |
| 2                              | rs10454142 | <i>PPP1R21</i>  | C            | T            | 0.302                  | 470                               | 19/104/112             | 0.44           | 0.42           | 0.536            |
| 7                              | rs3779195  | <i>BAIAP2L1</i> | A            | T            | 0.155                  | 472                               | 9/55/172               | 0.23           | 0.26           | 0.129            |
| 8                              | rs440837   | <i>ZBTB10</i>   | G            | A            | 0.234                  | 474                               | 11/89/137              | 0.38           | 0.36           | 0.587            |
| 10                             | rs7910927  | <i>JMJD1C</i>   | T            | G            | 0.473                  | 482                               | 47/134/60              | 0.56           | 0.50           | 0.093            |
| 12                             | rs4149056  | <i>SLCO1B1</i>  | C            | T            | 0.221                  | 452                               | 7/86/133               | 0.38           | 0.34           | 0.174            |
| 15                             | rs8023580  | <i>NR2F2</i>    | C            | T            | 0.266                  | 474                               | 19/88/130              | 0.37           | 0.39           | 0.505            |
| 17                             | rs12150660 | <i>SHBG</i>     | T            | G            | 0.244                  | 488                               | 16/87/141              | 0.36           | 0.37           | 0.604            |

Note: \* minor allele homozygotes / heterozygotes / major allele homozygotes
